# Supplementary figures and images for: Effect of amorphization on the structural stability and reversibility of Ge2Sb2Te5 and oxygen incorporated Ge2Sb2Te5 films
Source: Royal Society of Chemistry journal article supplement (doi:10.1039/c2jm31764h), 2012-01-01

Figure S1

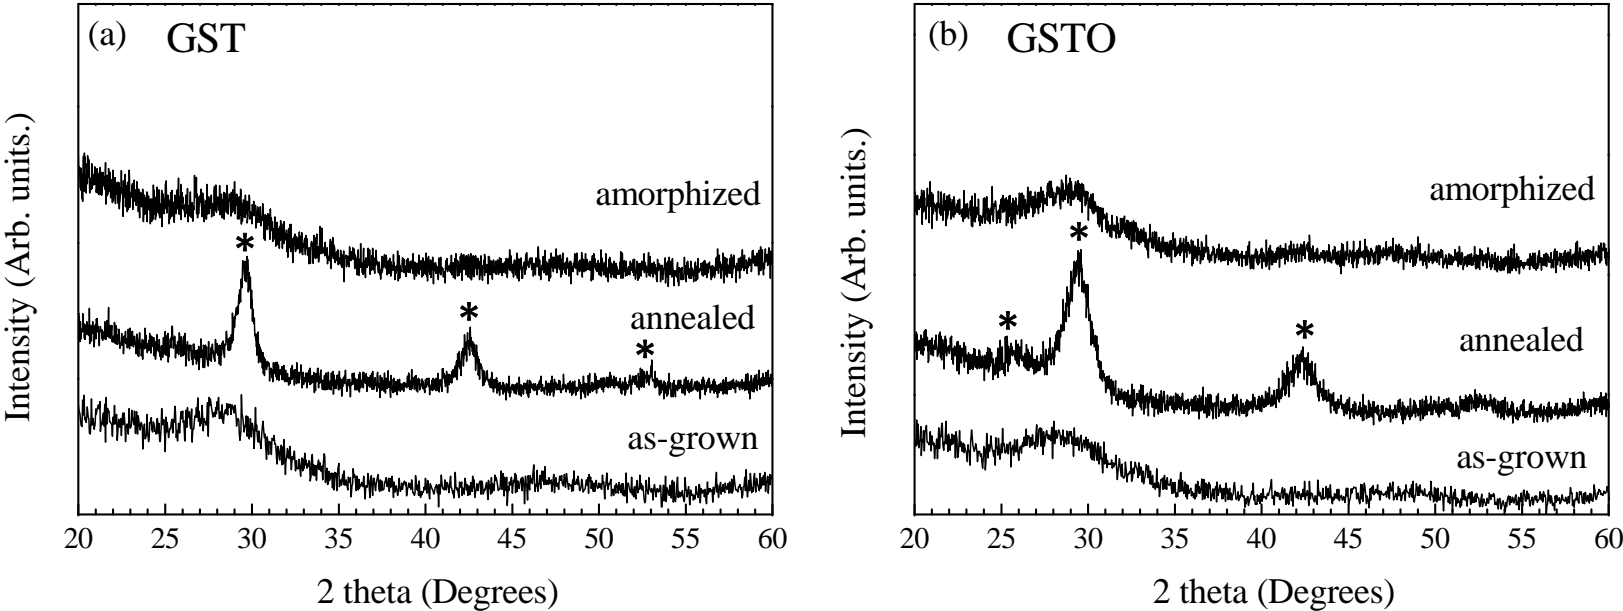

Figure S1 Park *et al.*

Supplement: c2jm31764h.pdf [file c2jm31764h.pdf]
